# Supplementary material for: Effect of duration and infection control barriers of light curing unit on hardness of Bulk Fill composite resin
Source: PeerJ. 2024 Sep 26;12:e18021. doi: 10.7717/peerj.18021 (PMC11439374; doi:10.7717/peerj.18021)
Supplement: Supplemental Information 1 [file peerj-12-18021-s001.xlsx]

## Sheet: F4
TOP	PE0																					PE1																					PE3
0	114.87	112.4	109.68	108.94	111.26	117.04	125.26	121.27	106.98	105.66	109.91	114.26	111.69	129.62	118.05	110.79	117.22	107.54	125.44	117.93	108.69	105.64	112.95	105.28	101.59	114.45	121.7	99.23	105.1	99.97	106.14	110.4	89.26	102.63	118	107.02	113.82	91.84	100.1	108.02	107.1	103.03	101.41	100.01	95.94	98.71	98.38	92.05	98.59
6	109.14	84.62	94.17	112.61	104.54	114.25	110.19	118.56	92.28	113.03	92.98	119.88	83.74	105.38	98.05	107.68	109.1	120.7	94.34	88.72	100.44	107.56	88.24	94.04	86.37	86.65	97.85	77.1	96.93	97.22	97.47	104.56	83.24	104.95	101.86	93.19	88.86	97.13	82.98	106.31	102.93	94.43	66.95	57.36	65.08	60.83	67.85	61.61	59.19
12	79.18	70.89	86.75	72.63	83.79	93.79	89.8	84.85	79.78	91.78	71.21	86.24	103.94	85.48	97.44	71.14	88.48	98.82	83.85	88.08	89.7	81.59	80.57	72.45	84.6	74.39	71.39	70.57	74.68	79.38	84.98	76.98	74.07	77.74	80.08	74.86	79.39	78.41	83.7	90.25	80.69	75.18	53	55.82	46.27	48.37	48.42	45.89	47.26
Bottom	PE0																					PE1																					PE3
0	69.1	68.6	75.4	74	68.3	72.7	72.5	79.4	71.9	68.7	70.8	73.3	76.2	73.5	71.8	77.4	72.7	70.6	75.1	69.5	75	70.3	68.2	67.3	67	66.3	65.4	67.2	62.8	64.8	59.8	64.7	67.2	76.5	68.7	67.2	68	64.5	69.5	57.7	67.9	62.5	59.3	55.1	59.5	48.8	50.8	59	56.9
6	66.2	58.8	56.6	63.1	62.1	71.1	69.3	65.1	67.2	57.7	68.9	64.2	66.3	62	70.1	58	66.4	66.8	64.2	63.4	54.6	55.9	55.7	55.9	52.2	54.4	55.1	55.4	56.1	58.1	54.7	57.2	59.5	56.5	58.2	54.5	56.6	56.8	57.9	56.6	58.2	56	30.8	28.6	28.6	30.6	31.6	28.1	31.7
12	55.6	44.9	48.7	50	52.7	46	56	56.9	42.9	51.9	49.7	43.4	45	55.1	56.8	43.3	52	53.8	55.3	40.4	48.8	36.9	39.9	44.5	40.3	40.7	31.8	43.8	42.1	37.1	37.8	38.5	32.8	46	37.4	39	42.4	44.8	42.7	44.2	33.9	35.7	23.6	28.5	21.1	21.6	24.1	26.5	17.9
percentage decrease (%)
	0.39845	0.38968	0.312546	0.320727	0.386123	0.378845	0.421204	0.345263	0.327912	0.349801	0.355837	0.358481	0.317754	0.432958	0.391783	0.301381	0.379799	0.3435	0.401307	0.410667	0.309964	0.334532	0.396193	0.360752	0.340486	0.420708	0.462613	0.322785	0.402474	0.351806	0.436593	0.413949	0.247143	0.254604	0.417797	0.37208	0.402565	0.297692	0.305694	0.46584	0.366013	0.393381	0.415245	0.449055	0.379821	0.505623	0.483635	0.359044	0.422862
	0.39344	0.305129	0.398959	0.439659	0.405969	0.377681	0.371086	0.450911	0.271782	0.489516	0.25898	0.464464	0.208264	0.411653	0.285059	0.461367	0.391384	0.446562	0.319483	0.285392	0.456392	0.48029	0.368767	0.405572	0.395623	0.372187	0.436893	0.281453	0.421232	0.402386	0.438802	0.452946	0.285199	0.461648	0.428628	0.415173	0.363043	0.415217	0.302242	0.467595	0.434567	0.406968	0.539955	0.501395	0.560541	0.496959	0.534267	0.543905	0.464437
	0.297802	0.366624	0.438617	0.311579	0.371047	0.509543	0.376392	0.329405	0.462271	0.434517	0.302064	0.496753	0.567058	0.355405	0.417077	0.391341	0.412297	0.455576	0.340489	0.541326	0.455964	0.547739	0.504778	0.385783	0.523641	0.452883	0.554559	0.37934	0.436261	0.532628	0.555189	0.49987	0.557176	0.408284	0.532967	0.479028	0.465928	0.428644	0.489845	0.510249	0.579874	0.52514	0.554717	0.48943	0.543981	0.553442	0.502272	0.422532	0.621244
	39.845	38.968	31.2546	32.0727	38.6123	37.8845	42.1204	34.5263	32.7912	34.9801	35.5837	35.8481	31.7754	43.2958	39.1783	30.1381	37.9799	34.35	40.1307	41.0667	30.9964	33.4532	39.6193	36.0752	34.0486	42.0708	46.2613	32.2785	40.2474	35.1806	43.6593	41.3949	24.7143	25.4604	41.7797	37.208	40.2565	29.7692	30.5694	46.584	36.6013	39.3381	41.5245	44.9055	37.9821	50.5623	48.3635	35.9044	42.2862
	39.344	30.5129	39.8959	43.9659	40.5969	37.7681	37.1086	45.0911	27.1782	48.9516	25.898	46.4464	20.8264	41.1653	28.5059	46.1367	39.1384	44.6562	31.9483	28.5392	45.6392	48.029	36.8767	40.5572	39.5623	37.2187	43.6893	28.1453	42.1232	40.2386	43.8802	45.2946	28.5199	46.1648	42.8628	41.5173	36.3043	41.5217	30.2242	46.7595	43.4567	40.6968	53.9955	50.1395	56.0541	49.6959	53.4267	54.3905	46.4437
	29.7802	36.6624	43.8617	31.1579	37.1047	50.9543	37.6392	32.9405	46.2271	43.4517	30.2064	49.6753	56.7058	35.5405	41.7077	39.1341	41.2297	45.5576	34.0489	54.1326	45.5964	54.7739	50.4778	38.5783	52.3641	45.2883	55.4559	37.934	43.6261	53.2628	55.5189	49.987	55.7176	40.8284	53.2967	47.9028	46.5928	42.8644	48.9845	51.0249	57.9874	52.514	55.4717	48.943	54.3981	55.3442	50.2272	42.2532	62.1244
[truncated: 14 more columns]

## Sheet: F3
	PE0																					PE1																					PE3
0	1484	1499	1494	1440	1483	1505	1514	1502	1512	1455	1490	1490	1469	1454	1459	1509	1499	1488	1508	1453	1523	1377	1345	1365	1317	1314	1306	1380	1380	1327	1282	1328	1343	1288	1402	1305	1390	1339	1320	1343	1333	1372	1195	1200	1177	1202	1193	1176	1209
6	1158	1150	1157	1159	1182	1135	1014	1160	1248	1208	1188	1079	1134	1134	1152	1176	1169	1215	1152	1194	1160	1070	1018	1014	1074	1091	1072	1076	1104	1112	1096	948	1086	1081	1035	1094	998	1002	1106	1088	995	1155	862	917	780	763	921	849	834
12	948	1002	1045	1123	1103	1029	1052	1048	925	968	966	1129	1129	1006	1052	1103	1030	1102	947	1048	896	961.618	866.335	978.833	873.171	883.942	1034.95	931.658	961.605	955.43	1030.75	909.142	905.991	936.518	887.87	880.916	951.864	943.176	1014.43	952.705	1015.37	894.028	724	691	717	798	811	797	759
[truncated: 14 more columns]

## Sheet: F2
0	6	12
1484	1158	948
1499	1150	1002
1494	1157	1045
1440	1159	1123
1483	1182	1103
1505	1135	1029
1514	1014	1052
1502	1160	1048
1512	1248	925
1455	1208	968
1490	1188	966
1490	1079	1129
1469	1134	1129
1454	1134	1006
1459	1152	1052
1509	1176	1103
1499	1169	1030
1488	1215	1102
1508	1152	947
1453	1194	1048
1523	1160	896
